# Supplementary material for: Molecular Interactions between APIs and Enteric Polymeric Excipients in Solid Dispersion: Insights from Molecular Simulations and Experiments
Source: MDPI journal article supplement (doi:10.3390/pharmaceutics15041164), 2023-04-06
Supplement: s1 [file s1]

# Molecular Interactions between APIs and Enteric Polymeric Excipients in Solid Dispersion: Insights from Molecular Simulations and Experiments

Krishna M. Gupta<sup>1\*</sup>, Xavier Chin<sup>1</sup> and Parijat Kanaujia<sup>1, 2\*</sup>

1. Institute of Sustainability for Chemicals, Energy and Environment (ISCE<sup>2</sup>), Agency for Science, Technology and Research (A\*STAR), 1 Pesek Road, Jurong Island, Singapore 627833, Republic of Singapore
2. Department of Pharmacy, National University of Singapore, 18 Science Drive 4, Singapore 117559

**Table S1.** Solubilities, melting points, and degradation temperatures of the API and polymers.

| Drug              | MW (Da) | Solubility                          | Melting point/Tg (°C) | Degradation temp (°C) |
|-------------------|---------|-------------------------------------|-----------------------|-----------------------|
| Diclofenac Sodium | 318.13  | Soluble in water                    | 285                   | 285                   |
| Naproxen          | 230.25  | Practically insoluble at pH below 4 | 155                   | 196                   |
| Dimethyl fumarate | 144.12  | Soluble in water                    | 102                   | Not reported          |
| Omeprazole        | 345.4   | Very slightly soluble in water      | 156                   | 156                   |
| HPMC-P 55         | 35000   | Soluble above pH 5.5                | 143                   | 199                   |
| HPMC-AS (LF)      | 16000   | Soluble above pH 5.5                | 122                   | 204                   |
| Eudragit L100-55  | 135000  | Soluble above pH 5.5                | 120                   | 170                   |

**Table S2.** Number of Hydrogen-bonds between polymer excipients and APIs.

| Polymer excipients | Drug APIs |                   |                   |            |
|--------------------|-----------|-------------------|-------------------|------------|
|                    | Naproxen  | Diclofenac sodium | Dimethyl fumarate | Omeprazole |
| HPMC(P)            | 0.73      | 1.37              | 0.36              | 1.29       |
| HPMC(AS)           | 0.86      | 1.84              | 0.62              | 1.50       |
| Eudragit L100      | 1.07      | 1.61              | 0.93              | 1.78       |

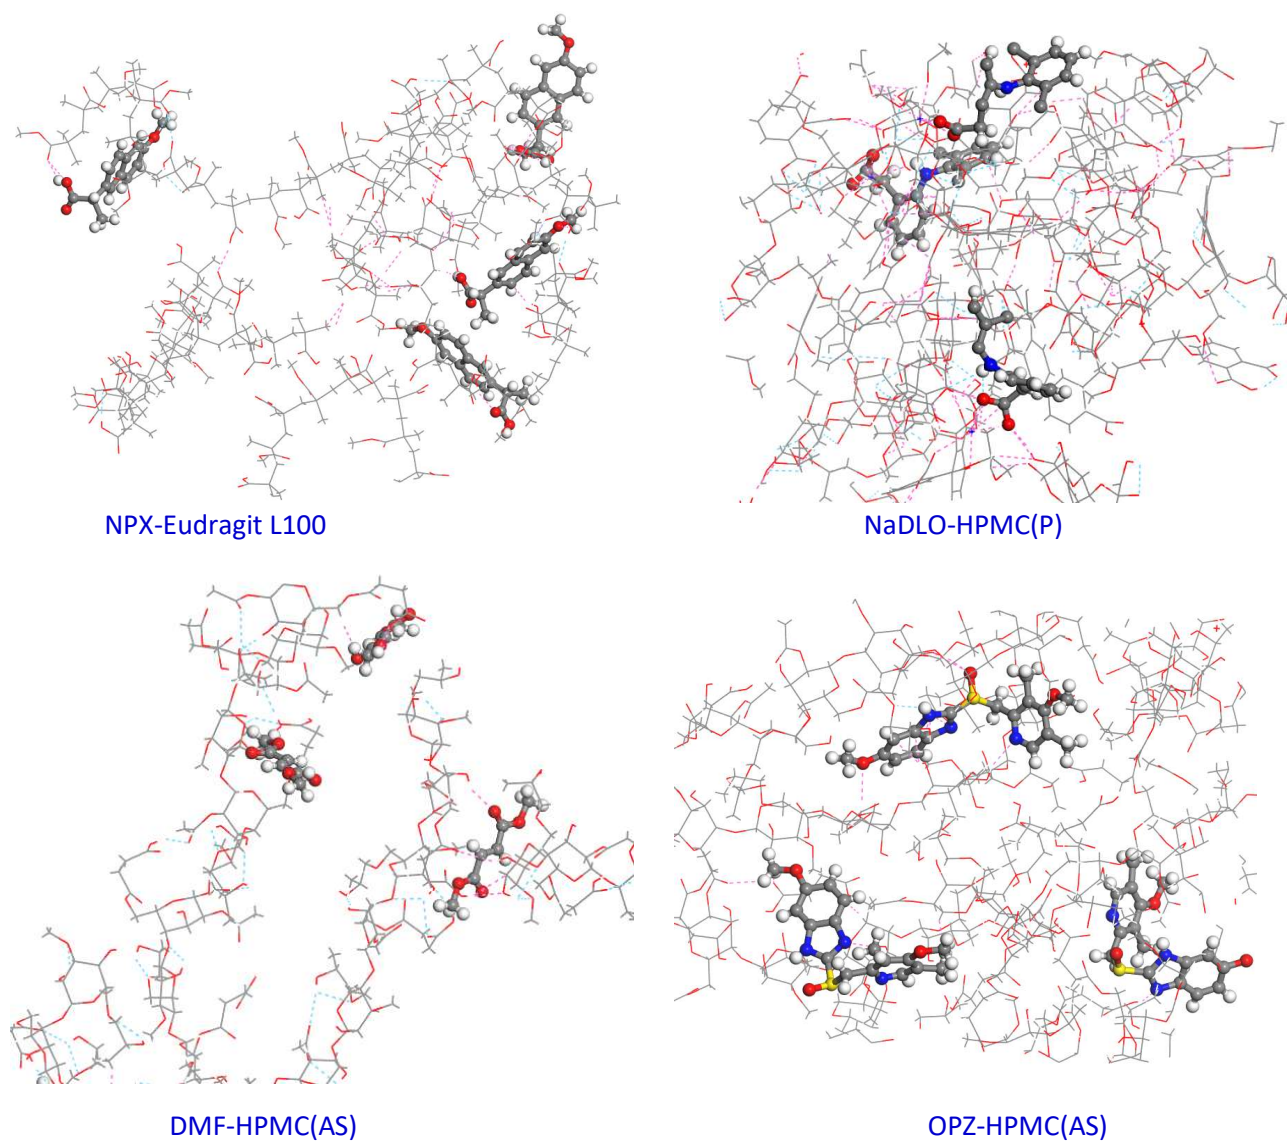

**Fig. S1.** Part of the final snapshots from MD simulations corresponding to the best API-polymer pairs.

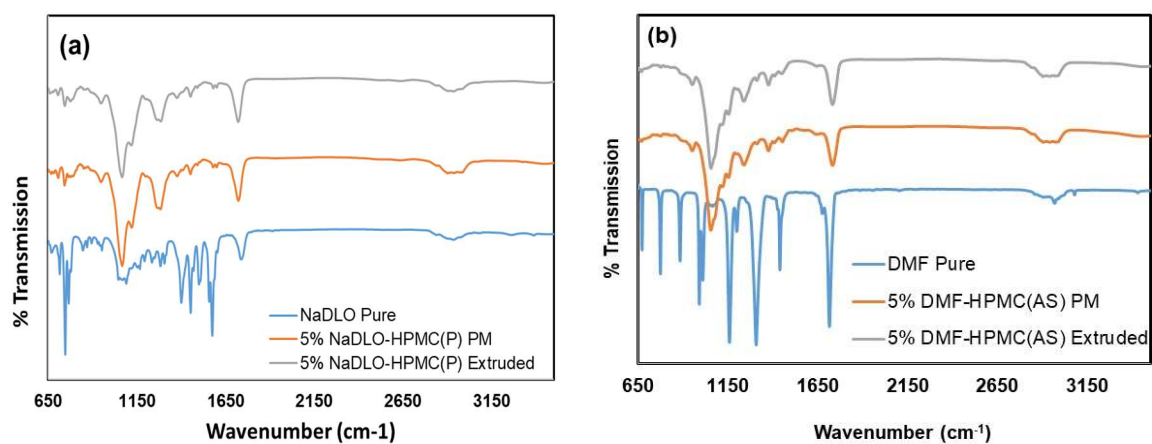

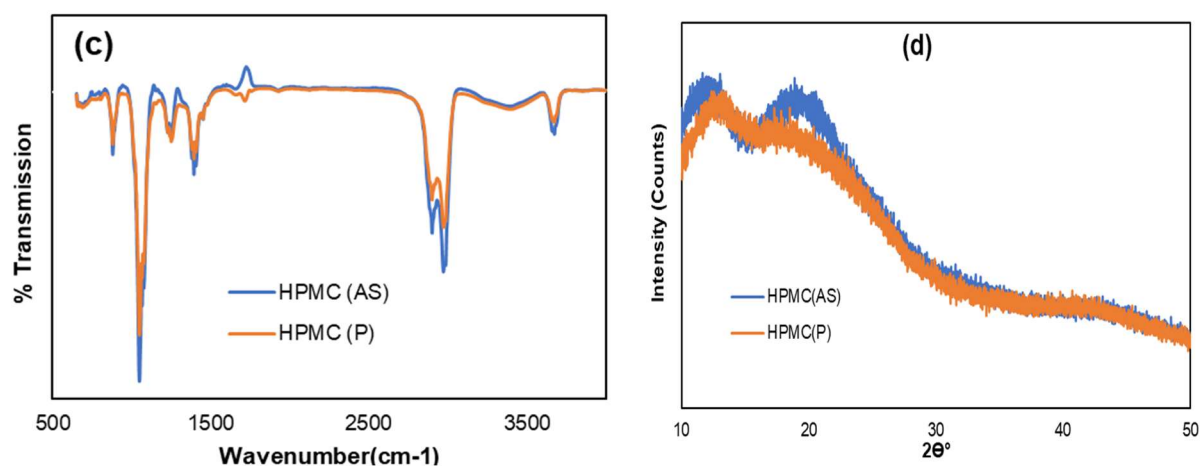

**Fig. S2.** FTIR spectra of at 5% w/w API loading in (a) NaDLO–HPMC(P) physical mixture and extruded, (b) DMF– HPMC(AS) physical mixture and extruded, (c) FTIR and (d) PXRD of pure polymers.

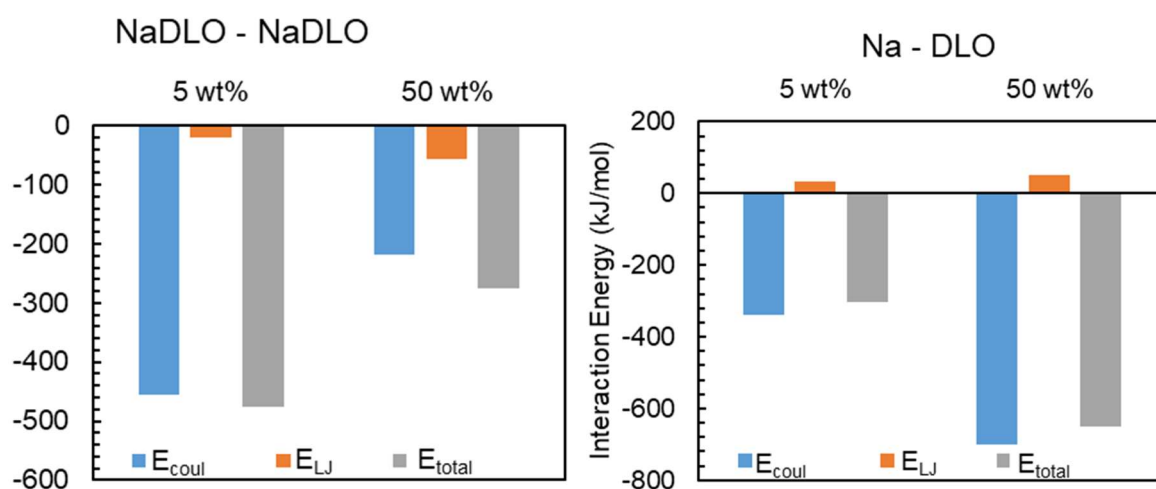

**Fig. S3.** Interaction energies between: NaDLO and NaDLO, and Na<sup>+</sup> and DLO at 5 and 50 wt% NaDLO.

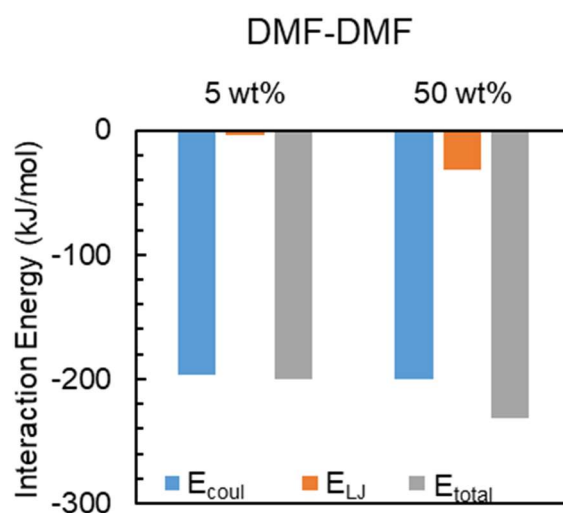

**Fig. S4.** Interaction energies between DMF and DMF at 5 and 50 wt% DMF.
